# Supplementary material for: Whole exome sequencing in 342 congenital cardiac left sided lesion cases reveals extensive genetic heterogeneity and complex inheritance patterns
Source: PubMed Central journal article supplement (PMC5664429; doi:10.1186/s13073-017-0482-5), 2017-10-31
Supplement: 13073_2017_482_MOESM4_ESM.pdf [file 13073_2017_482_MOESM4_ESM.pdf]

### Rare DNS in LVOTO cases

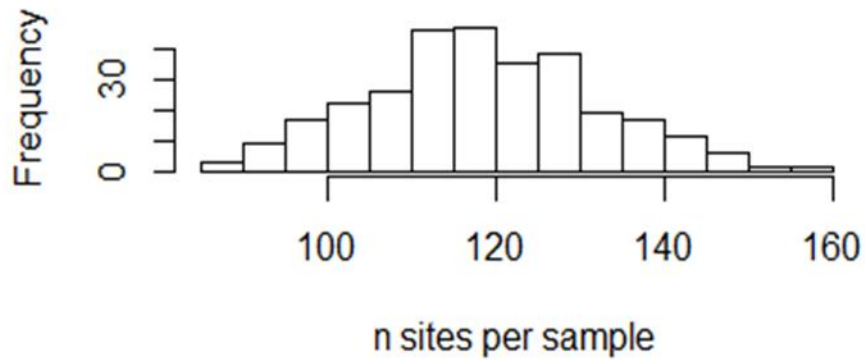

### Rare LOF in LVOTO cases

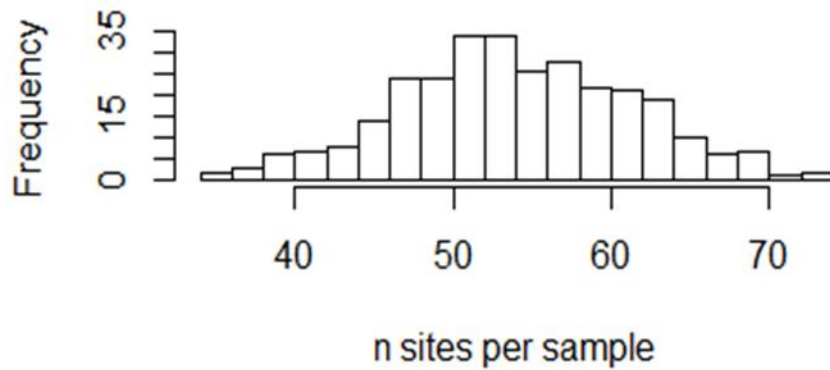

**Figure S1** - Distribution of rare sites within LSL cases. These histograms depict the number of rare (a) DNS and (b) LOF sites per sample.
